# Supplementary material for: Detailed Phytochemical Analysis of High- and Low Artemisinin-Producing Chemotypes of Artemisia annua
Source: Front Plant Sci. 2018 May 18;9:641. doi: 10.3389/fpls.2018.00641 (PMC5968107; doi:10.3389/fpls.2018.00641)
Supplement: Supplementary file 2 [file Data_Sheet_2.XLSX]

## Sheet: final
Supplementary Table 2
Levels of 75 UPLC-MS detected metabolites for three different leaf types extracted from Artemis and NCV.
Peak_ID	Ion Formula	Annotation	Statistical model	p-value	Leaf 1-5 (juvenile)				Leaf 11-13 (mature)				Dried leaf
					Artemis		NCV		Artemis		NCV		Artemis		NCV
					µg/mg DW	Sign	µg/mg DW	Sign	µg/mg DW	Sign	µg/mg DW	Sign	µg/mg DW	Sign	µg/mg DW	Sign
M235.1716T85	C15H23O2	artemisinic acid	REML	0	8.11242	d	78.125	a	1.51509	bc	7.46654	bd	1.08802	c	7.22851	d
M237.1871T84	C15H25O2	dihydroartemisinic acid	REML	0	44.9245	d	1.85778	ab	4.74907	c	0.0429388	a	3.52438	bc	0.128576	a
M283.1568T61	C15H23O5	artemisinin	REML	0	2.39524	d	0.107876	a	9.23341	b	0.417297	a	12.8705	c	0.602192	a
M249.1509T50	C15H21O3	arteannuin B	REML	0	0.105945	b	2.57299	a	0.194721	b	4.68501	c	0.261227	b	5.84081	d
M375.1112T54	C12H23O13	casticin /chrysoplenetin 1	REML	0	4.21996	c	5.06367	a	1.25071	b	1.18517	b	1.4394	b	1.73079	b
M153.1287T65	C10H17O	artemisia ketone	REML	0	0.0107255	b	11.0817	a	0.00662416	b	2.68079	c	0.0254337	b	1.51652	d
M282.2818T96	C18H36NO	unknown	REML	0	0.0861941	a	0.141578	a	0.0519184	a	0.0531373	a	3.14296	b	3.27598	b
M183.0668T36	C9H11O4	2,4-dihydroxy-6-methoxy acetophenone	REML	0	6.16779	a	4.89117	a	0.503948	b	0.23136	b	0.150914	b	0.0779695	b
M235.1716T72	C15H23O2	dihydro-epi-deoxyarteannuin B	REML	0	1.48392	d	0.147711	a	2.41377	b	0.123193	a	3.25261	c	0.140711	a
M235.1716T59	C15H23O2	dihydroartemisinic acid tertiary allylic hydroperoxide C15H23O2	REML	0	7.05034	c	0.301034	a	1.66818	b	0.0683466	a	0.126607	a	0.0707969	a
M281.1774T46	C16H25O4	unknown	REML	0	0.0350103	b	1.29064	a	0.0634159	b	2.34983	c	0.054759	b	1.63689	a
M193.0512T23	C10H9O4	scopoletin	REML	0	2.79172	a	2.49922	a	0.767882	b	0.362936	bc	0.0618711	c	0.0252629	c
M233.1557T67	C15H21O2	epi-deoxyarteannuin B	REML	0	0.0423657	b	3.08803	a	0.0155167	b	0.535782	b	0.022435	b	0.227619	b
M237.1871T64	C15H25O2	unknown	REML	0	0.469017	be	0.110975	a	0.538908	b	0.305338	c	0.83612	d	0.377228	ce
M205.1969T88	C15H25	unknown	REML	0	1.41661	a	1.4504	a	0.161829	bc	0.0233865	b	0.178784	c	0.10817	bc
M235.1716T63	C15H23O2	dihydroartemisinic acid tertiary allylic hydroperoxide2 C15H23O2	REML	0	0.839053	b	0.0493968	a	0.752156	b	0.0460088	a	0.446336	c	0.0357183	a
M267.1618T62	C15H23O4	deoxyartemisinin	REML	0	0.127583	a	0.0457591	a	0.380272	b	0.0994019	a	0.95407	c	0.0556865	a
M219.1764T87	C15H23O	artemisinic aldehyde	REML	0	0.684434	c	0.804626	a	0.163974	b	0.0731182	b	0.132103	b	0.0959078	b
M269.1775T53	C15H25O4	unknown	REML	0	0.173919	d	0.00887803	a	0.463228	b	0.0315008	a	0.690939	c	0.0261857	a
M249.1509T63	C15H21O3	4,5-seco-amorpha-11,13-ene-12-oic acid	REML	0	0.0402313	b	0.442331	a	0.0365046	b	0.719447	c	0.0206194	b	0.271592	d
M280.2661T92	C18H34NO	unknown	REML	0	0.0184213	a	0.0318521	a	0.0136782	a	0.0136941	a	0.413585	b	0.414401	b
M447.4240T100	C30H55O2	unknown	REML	2.43894e-08	0.00222674	a	0.00281454	a	0.278177	b	0.273685	b	0.314653	b	0.267696	b
M251.1667T49	C15H23O3	unknown	REML	0	0.412738	bc	0.0363273	a	0.455896	b	0.041868	a	0.356957	c	0.0292035	a
M256.2659T94	C16H34NO	unknown	REML	0	0.0210386	a	0.0210601	a	0.0150312	a	0.012813	a	0.352982	b	0.360129	b
M355.1058T13	C16H19O9	unknown	REML	0	0	a	0	a	0.000765186	a	0	a	0.448629	b	0.265745	c
M361.0955T47	C11H21O13	unknown	REML	2.8705e-07	0.230993	b	0.182796	ab	0.153321	a	0.0465642	c	0.207775	ab	0.136386	a
M621.3174T104	C47H41O	unknown	REML	0	0.304449	b	0.450924	a	0.251482	b	0.241732	b	0.0020746	c	0.00555679	c
M221.1921T86	C15H25O	unknown	REML	0	0.902261	c	0.249551	a	0.0403406	b	0.00695044	b	0.0131329	b	0.00451485	b
M284.2976T100	C18H38NO	unknown	REML	0	0.0157278	a	0.0272172	a	0.00895183	a	0.00945484	a	0.284896	b	0.305077	b
M251.1667T67	C15H23O3	11-Hydroxy-arteannuin I (cmpd 18)	REML	0	0.00380171	a	0.0912372	ab	0.00694939	a	0.161009	b	0.0368735	a	0.42279	c
M267.1621T50	C15H23O4	Dihydroxycadinanolide	REML	0	0.0140605	b	0.172848	a	0.0091279	b	0.302926	c	0.0143735	b	0.280925	c
M345.1004T63	C18H17O7	unknown	REML	8.61351e-09	0.564126	b	0.0804646	a	0.0948505	a	0.013266	a	0.121739	a	0.0174317	a
M207.1398T63	C13H19O2	unknown	REML	0	0	a	0.0127068	a	0.000438937	a	0.0374889	a	0.0164983	a	0.388526	b
M237.1874T73	C15H25O2	unknown	REML	0	0.0147247	a	0.00833359	a	0.0322449	a	0.132734	b	0.106992	b	0.198055	c
M221.1556T43	C14H21O2	arteannuin x	REML	0	0.0289379	b	0.0653142	ab	0.0494726	ab	0.137395	c	0.069111	a	0.18448	d
M281.1410T53	C15H21O5	artemisitene	REML	0	0	a	0.00160807	a	0	a	0.0746244	a	0.00253669	a	0.326975	b
M203.1814T71	C15H23	unknown	REML	0	0.182573	d	0.3103	a	0.111359	b	0.106683	b	0.00881685	c	0.000667521	c
M277.2188T77	C18H29O2	unknown	REML	0	0.00176632	a	0.00476795	a	0	a	0	a	0.269541	b	0.0955266	c
M267.1617T42	C15H23O4	Arteannuin T (cmpd 69)	REML	0	0.00114281	a	0.00479895	a	0.00620922	a	0.0382857	a	0.0298227	a	0.29313	b
M265.1459T55	C15H21O4	deoxyartemisitene	REML	0	0	a	0.00231376	a	0.00116869	a	0.0433801	a	0.0216976	a	0.30136	b
M239.1300T48	C13H19O4	Arteannuin Z (cmpd 78)	REML	0	0	a	0.00714568	a	0.000699867	a	0.0532917	b	0.0221926	ab	0.271953	c
M203.1813T80	C15H23	amorpha-4,11-diene tertiary allylic hydroperoxide C15H23	REML	0	0.122141	c	0.280409	a	0.0344586	b	0.0596498	bc	0.0315778	b	0.0431314	b
M207.1398T59	C13H19O2	isoarteannuin A	REML	0	0	b	0.0412873	a	0.00137474	b	0.113941	c	0.0174167	ab	0.225423	d
M237.1509T49	C14H21O3	unknown	REML	0	0.308521	c	0.0282801	a	0.222054	b	0.0220493	a	0.0150185	a	0.0122443	a
M219.1764T78	C15H23O	unknown	REML	0	0.124338	b	0.252373	a	0.0956554	b	0.0989358	b	0.0139543	c	0.0104829	c
M225.1506T57	C13H21O3	unknown	REML	0	0.0460116	b	0.4055	a	0.0141472	b	0.0455069	b	0.00937543	b	0.0396607	b
M205.1606T85	C14H21O	unknown	REML	0	0.112547	c	0.312509	a	0.0154039	b	0.0288589	b	0.0101085	b	0.0233733	b
M237.1510T42	C14H21O3	unknown	REML	0	0.0261688	a	0.00230951	a	0.0786596	b	0.00642903	a	0.172399	c	0.0309395	a
M249.1510T68	C15H21O3	unknown	REML	0	0.0117253	b	0.369009	a	0.00379658	b	0.0527547	b	0.00594882	b	0.00927854	b
M219.1764T70	C15H23O	unknown	REML	0	0.0515756	c	0.0014449	a	0.117769	b	5.26594e-05	a	0.128633	b	0.00417615	a
M203.1813T91	C15H23	unknown	REML	0	0.199505	d	0.132383	a	0.00686652	b	0.00421046	b	0.0129679	b	0.0294373	c
M237.1509T57	C14H21O3	unknown	REML	0	0.0179487	a	0.0236298	ab	0.0162337	a	0.0503394	c	0.0433521	bc	0.109452	d
M249.1508T75	C15H21O3	Arteannuin W (cmpd 73)	REML	0	0.00326665	a	0.0255183	a	0.0071777	a	0.117315	b	0.0199991	a	0.103564	b
M329.1050T76	C18H17O6	unknown	REML	3.33067e-16	0.170973	b	0.0267787	a	0.0291586	a	0.00241564	a	0.0458885	a	0.00613373	a
M575.5090T99	C37H67O4	unknown	REML	5.89613e-05	0.0344168	b	0.0934908	a	0.00684156	b	0.0047238	b	0.0520009	ab	0.0385085	b
M221.1918T84	C15H25O	artemisinic alcohol	REML	0	0.00542493	b	0.0754401	a	0.00140686	b	0.00703039	bc	0.0260078	c	0.081192	a
M284.1965T82	C19H26NO	unknown	REML	9.21432e-11	0.0112223	ac	0	a	0.074138	b	0	a	0.0565641	b	0.0436001	bc
M353.2720T90	C21H37O4	unknown	REML	0	0	a	0	a	0	a	0	a	0.11082	b	0.016957	a
M331.1782T89	C16H27O7	unknown	REML	0	0.0180878	b	0.152276	a	0.000696341	b	0.00833562	b	0.00260113	b	0.0309764	b
M235.1352T58	C14H19O3	unknown	REML	0	0.0170178	b	0.0574301	a	0.0121789	b	0.110928	c	0.00840253	b	0.0113355	b
M345.1212T15	C15H21O9	unknown	REML	0	0.0034795	a	0	a	0	a	0	a	0.0723076	b	0.0382212	c
M439.3610T104	C30H47O2	unknown	REML	0	0.0593685	b	0.000377687	a	0.0176093	a	0	a	0.0661302	b	0.00355276	a
M529.2841T65	C23H45O13	unknown	REML	0	0	a	0.0029128	a	0	a	0.0458851	b	0	a	0.0798145	c
M515.3047T75	C23H47O12	unknown	REML	0	0	a	0	a	0	a	0.00109666	a	0	a	0.10161	b
M327.0111T58	C23H3O3	unknown	REML	0	0.0027294	b	0.016298	a	0.00575914	ab	0.00759728	ab	0.0426845	c	0.031772	d
M331.1782T91	C16H27O7	unknown	REML	0	0.0270841	c	0.100461	a	0.00146631	bc	0.00513784	bc	0.00304143	b	0.0175024	bc
M268.1935T49	C15H26NO3	unknown	REML	0	0.000321369	a	0	a	0.0146974	a	0	a	0.0827491	b	0	a
M283.1568T45	C15H23O5	4,5-seco-4-keto-5-carboxylic-amorphan-11,13-ene-12-oic acid (cmpd 71)	REML	0	0.00244668	a	0	a	0.00108082	a	0.00247095	a	0.00688147	a	0.0757753	b
M223.0622T15	C11H11O5	isofraxidin	REML	1.02141e-14	0.0253087	b	0.125581	a	0.00106234	b	0.00415954	b	0.000548679	b	0.00182285	b
M205.1605T7	C14H21O	unknown	REML	7.10543e-15	0.0403119	c	0.0992973	a	0.00262577	b	0.00430719	b	0.00062382	b	0.00185495	b
M252.1702T82	C18H22N	unknown	REML	0	0.00728416	a	0	a	0.0540484	b	0.000175585	a	0.0437215	c	0	a
M360.1533T13	C12H26NO11	unknown	REML	1.26856e-08	0	a	0	a	0	a	0	a	0.0156217	a	0.0465535	b
M267.1979T73	C16H27O3	unknown	REML	0	0.00982715	b	0	a	0.0124085	b	0.000154413	a	0.036285	c	0.000331598	a
M457.3357T79	C29H45O4	unknown	REML	0	0.00372348	a	0	a	0.0292234	b	0	a	0.0189315	c	0	a
M169.1238T39	C10H17O2	unknown	REML	0	0.00179237	b	0.0557615	a	0.000829978	b	0.00641838	b	0.000657731	b	0.000277593	b
