# Supplementary material for: Detailed Phytochemical Analysis of High- and Low Artemisinin-Producing Chemotypes of Artemisia annua
Source: Front Plant Sci. 2018 May 18;9:641. doi: 10.3389/fpls.2018.00641 (PMC5968107; doi:10.3389/fpls.2018.00641)
Supplement: Supplementary file 3 [file Data_Sheet_3.XLSX]

## Sheet: final
Supplementary Table 3
Levels of 202 GC-MS detected metabolites for two different leaf types extracted from Artemis and NCV.
Peak_ID	Annotation	Statistical model	p-value	Leaf 1-5 (juvenile)				Leaf 11-13 (mature)
				Artemis		NCV		Artemis		NCV
				Norm area	Sign	Norm area	Sign	Norm area	Sign	Norm area	Sign
M95T444	Camphor	REML	3.07058e-07	25.6849	c	7.01722	a	16.3739	b	4.25847	a
M83T403	Artemisia Ketone	REML	7.83502e-11	0.0060067	b	33.5837	a	0.0158427	b	10.8079	c
M206T778	Unknown	REML	7.06833e-11	0.0751248	b	3.60519	a	0.0718903	b	4.91738	c
M121T600	Germacrene A	REML	3.83303e-07	0.348584	b	11.311	a	0.160738	b	2.72463	b
M93T353	Camphene	REML	4.7029e-13	5.09282	c	1.48592	ab	2.17314	a	0.982181	b
M161T594	1,6-Cyclodecadiene, 1-methyl-5-methylene-8-(1-methylethyl)-, [s-(E,E)]-	REML	1.26083e-06	3.90074	b	0.0898793	a	0.156235	a	0.000419513	a
M167T681	Unknown	REML	8.20141e-09	3.89851	c	2.18377	a	0.340108	b	0.182682	b
M111T393	1,8-Cineole	REML	8.45195e-07	3.2666	b	0.400309	a	0.714694	a	0.214421	a
M192T742	2H-1-Benzopyran-2-one, 7-hydroxy-6-methoxy- (CAS)	REML	9.87902e-06	3.24442	a	3.11899	a	0.453029	b	0.52759	b
M95T458	Borneol	REML	1.30386e-07	3.14593	b	0.197912	a	1.00573	a	0.158823	a
M97T978	10-Heneicosene (c,t)	REML	9.17429e-09	0.0413028	a	0.036727	a	1.00689	b	1.19501	b
M133T574	trans-Caryophyllene	REML	0.000534573	0.661132	b	1.13584	a	0.574639	b	1.16086	a
M164T780	Unknown	REML	4.22995e-14	1.22458	b	0.0108916	a	1.16794	b	0.00629262	a
M93T346	Bicyclo[3.1.1]hept-2-ene, 2,6,6-trimethyl-, (Ã±)-	REML	9.33698e-14	2.65317	c	0.576606	ab	0.870154	a	0.227371	b
M161T739	Unknown	REML	9.69363e-09	2.641	c	0.0855186	a	1.14756	b	0.0411513	a
M161T649	Unknown	REML	8.88178e-16	2.43764	a	2.37533	a	0.368267	b	0.0858625	b
M232T763	Unknown	REML	3.45446e-12	0.0100468	b	0.89645	a	0.0179419	b	0.947459	a
M189T593	Unknown	REML	0.000346522	1.96801	b	0.0310251	a	0.0015137	a	0	a
M234T716	Unknown	REML	5.22319e-05	0.170961	b	1.8919	a	0	b	0	b
M119T388	Benzene, 1-methyl-2-(1-methylethyl)-	REML	0	1.00546	c	0.0109214	a	0.801832	b	0.00425414	a
M146T565	2H-1-Benzopyran-2-one (CAS)	REML	0.000289255	0.0245393	a	0.0214385	a	0.589176	b	0.736733	b
M85T416	Unknown	REML	6.96776e-12	0	b	1.58403	a	0.000378394	b	0.432688	c
M164T772	Unknown	REML	2.22173e-06	0.77727	b	0.0255191	a	0.683321	b	0.0876544	a
M124T759	Unknown	REML	2.89624e-12	0.791303	b	0	a	0.682421	b	0.179327	c
M59T947	Unknown	REML	2.94543e-06	0.87547	c	1.24822	a	0.398822	b	0.648699	bc
M93T407	Ã§-Terpinene	REML	0	1.42956	b	0.0112816	a	0.018777	a	0.00168952	a
M93T368	Ã¡-Pinene	REML	3.61588e-09	1.1985	b	0.260086	a	0.22706	a	0.119244	a
M107T442	Unknown	REML	7.11786e-06	1.059	b	0.0148047	a	0.225954	a	0	a
M69T580	1,6,10-Dodecatriene, 7,11-dimethyl-3-methylene-, (E)-	REML	3.08056e-10	1.04351	c	0.0451119	a	0.343926	b	0.0091286	a
M159T640	Unknown	REML	4.18565e-10	0.319623	b	0.99953	a	0.128061	b	0.285449	b
M189T593	Amorpha-4,11-diene	REML	6.39498e-05	0.951613	b	0.490611	ab	0.0228977	a	0.00837267	a
M111T410	CIS-SABINENEHYDRATE	REML	0	0.703769	c	0.0185608	a	0.239046	b	0.0125752	a
M123T753	Unknown	REML	2.48854e-07	0.38998	b	0	a	0.280825	b	0.0117501	a
M91T547	Unknown	REML	2.09614e-08	0.229962	b	0.623396	a	0.10016	b	0.200413	b
M179T736	Unknown	REML	1.33227e-15	0.473151	c	0.00225444	a	0.277117	b	0.00282513	a
M109T519	Unknown	REML	0.00027974	0.633344	b	0	a	0.065688	a	0	a
M93T365	Sabinene	REML	6.74273e-08	0.603672	b	0.0798455	a	0.0503559	a	0.0107798	a
M58T750	Unknown	REML	1.84146e-11	0	a	0.0465434	a	0.000251237	a	0.24445	b
M135T693	Unknown	REML	3.02967e-11	0.00975853	c	0.0953808	a	0.142637	a	0.234423	b
M121T602	bicyclogermacrene	REML	1.55024e-08	0.0310339	c	0.113663	a	0.243283	b	0.00316419	c
M109T701	Unknown	REML	2.88658e-15	0.305254	c	0.00908979	a	0.236268	b	0.000446389	a
M230T760	Unknown	REML	2.27818e-12	0	b	0.079427	a	0	b	0.222787	c
M120T647	Unknown	REML	0	0.521553	b	0.0352399	a	0.0289121	a	0.00350614	a
M222T766	Unknown	REML	7.3701e-11	0	a	0.0555016	a	0.000493702	a	0.21448	b
M109T528	p-Mentha-6,8-dien-2-ol, acetate, cis-	REML	1.04983e-07	0.507771	b	0.00253077	a	0.184877	a	0.0008922	a
M57T362	7-Octen-4-ol (CAS)	REML	6.94474e-07	0.24934	b	0.00132014	a	0.203874	b	9.39813e-05	a
M191T756	Unknown	REML	1.14697e-09	0.000739634	a	0.0466743	a	0.0126899	a	0.191036	b
M132T685	Unknown	REML	4.9534e-07	0.452476	b	0.130752	a	0.00569394	a	0	a
M84T700	Unknown	REML	1.65316e-09	0.451341	c	0.149413	a	0	b	0	b
M162T658	Unknown	REML	2.66454e-14	0.427278	b	0	a	0.00589049	a	0	a
M203T692	Unknown	REML	2.73525e-11	0.306735	c	0	a	0.183869	b	0.00775918	a
M137T782	Unknown	REML	9.85015e-05	0.390827	b	0.0281794	a	0.159991	a	0.0398122	a
M93T372	alpha-Myrcene	REML	0.0232943	0.384456	b	0	a	0.00201153	a	0	a
M206T687	Unknown	REML	2.09388e-13	0	a	0.0137353	a	0	a	0.15918	b
M83T652	Unknown	REML	1.56752e-12	0.0271377	b	0.358083	a	0.0053373	b	0.0470622	b
M107T433	chrysanthenone	REML	2.61001e-06	0.354014	c	0.00510188	ab	0.159688	a	0.000183914	b
M205T735	Unknown	REML	1.89669e-07	0	a	0	a	0.158305	b	0.0310827	a
M220T655	Unknown	REML	2.75884e-10	0.322799	b	0.0772578	a	0.000806848	a	0.00155486	a
M204T656	Unknown	REML	0	0.294341	c	0	a	0.0533798	b	0.00688722	a
M222T815	Unknown	REML	6.65471e-06	0.193347	b	0.00664691	a	0.125869	b	0.0303485	a
M82T678	Unknown	REML	2.02919e-10	0.088411	c	0.258846	a	0	b	0.00593921	b
M138T931	Unknown	REML	6.70451e-07	0.0021794	a	0.00103345	a	0.0636349	b	0.109644	c
M167T770	Unknown	REML	5.60072e-06	0.201177	c	0.000933485	a	0.112321	b	0.00573177	a
M93T499	Unknown	REML	0.0233575	0.213879	b	0	a	0.109844	ab	0.000404311	a
M59T468	3-Cyclohexene-1-methanol, Ã ,Ã ,4-trimethyl- (CAS)	REML	7.23865e-13	0.242235	b	0.00738063	a	0.0351372	a	0.000744497	a
M97T889	Unknown	REML	1.26897e-09	0.0873987	c	0.232314	a	0.00724725	b	0.0780877	c
M159T762	Unknown	REML	1.42085e-05	0	b	0.0594024	a	0	b	0.0992738	a
M109T659	Unknown	REML	3.39728e-14	0.231239	c	0.00179915	a	0.0506607	b	0	a
M59T373	Unknown	REML	1.55864e-12	0	b	0.222709	a	0	b	0.0682034	c
M152T664	Unknown	REML	8.88178e-16	0.161099	c	0	a	0.0964571	b	0	a
M109T479	Unknown	REML	1.18042e-05	0.206309	b	0.00321836	a	0.0944995	a	0.00252483	a
M167T632	Unknown	REML	0.00902538	0.060426	b	0.122062	a	0.0410104	b	0.0898109	ab
M164T536	Phenol, 2-methoxy-4-(2-propenyl)- (CAS)	REML	2.73682e-09	0.215592	c	0.0801035	a	0.0802485	a	0.00168194	b
M161T556	Ã -Copaene	REML	6.08402e-14	0.0419289	c	0.00158681	a	0.0925968	b	0.000886482	a
M124T710	Unknown	REML	1.00248e-09	0	a	0	a	0	a	0.0867952	b
M164T711	Unknown	REML	3.31088e-07	0.0102853	c	0.0383447	a	0.0650129	b	0.0837423	b
M182T737	Unknown	REML	2.68125e-05	0.0476784	b	0	a	0.0833659	b	0.00548636	a
M82T764	Octadecanal (CAS)	REML	1.29449e-07	0.0480391	b	0.173179	a	0.00956793	b	0.0452435	b
M230T783	Unknown	REML	1.39749e-09	0	a	0.0160504	a	0	a	0.0680043	b
M97T567	Unknown	REML	6.66134e-16	0.000930389	b	0.0156334	a	0.00828477	ab	0.0669228	c
M125T647	Unknown	REML	1.33227e-15	0.0852207	c	0	a	0.0690139	b	0	a
M222T777	Unknown	REML	0.000207788	0.0361536	b	0.153343	a	0	b	0.00236673	b
M53T453	Unknown	REML	9.17895e-07	0.150369	b	0.02138	a	0.0584105	a	0.0404851	a
M57T344	PROPYL 2-METHYLBUTYRATE	REML	9.86368e-08	0.147408	b	0.0342228	a	0.0262452	a	0.00275009	a
M203T688	Unknown	REML	0.00132446	0.054844	ab	0.0964358	a	0.0636334	a	0.0144168	b
M218T657	Unknown	REML	2.27418e-12	0.14593	d	0.0928389	a	0.048509	b	0.0109555	c
M82T488	Unknown	REML	7.17867e-06	0.124759	c	0.00455852	ab	0.0568814	a	0.00239931	b
M71T463	Unknown	REML	0	0.127708	c	0.00202065	a	0.0328808	b	0.00110395	a
M95T510	Unknown	REML	4.04058e-09	0.124306	b	0.00783258	a	0.0302406	a	0.00151023	a
M59T392	Unknown	REML	1.72479e-08	0	b	0.109913	a	0	b	0.0189586	b
M180T712	Unknown	REML	1.62944e-06	0.00646773	a	0	a	0.0487295	b	0.00519185	a
M178T728	Unknown	REML	9.67417e-10	0	a	0.00721364	a	0	a	0.0437941	b
M70T422	Unknown	REML	0.000106923	0.0388427	b	0.0786602	a	0.0351796	b	0.043454	b
M71T450	Unknown	REML	0	0.0980925	c	0.000107397	a	0.026662	b	0	a
M105T522	Unknown	REML	1.9984e-15	0.0147879	bc	0.089619	a	0.00337422	b	0.027224	c
M190T671	Unknown	REML	3.61097e-07	0.0248229	c	0	a	0.0388821	b	0	a
M68T441	Unknown	REML	2.52365e-06	0.0390797	c	0.0863479	a	0.00518255	b	0.0151081	bc
M84T484	Unknown	REML	4.27964e-05	0.0887619	b	0.00794514	a	0.0319757	a	0.00522995	a
M99T426	Unknown	REML	0.00232685	0.0556283	c	0	a	0.0385658	b	0	a
M163T660	Unknown	REML	0.0175322	0.014483	b	0.0542163	a	0.0203966	b	0.035285	ab
M111T669	Unknown	REML	0.00106029	0.0349728	b	0.0180784	a	0.0365883	b	0.0115514	a
M182T642	Unknown	REML	1.54584e-08	0	a	0	a	0.0356549	b	0	a
M99T520	Unknown	REML	5.55906e-10	0	b	0.077988	a	0	b	0.0188075	b
M204T768	Unknown	REML	0.000107638	0.0263518	b	0.000361923	a	0.0346872	b	0.000794784	a
M82T702	Unknown	REML	6.87314e-10	0.0352921	c	0.0771771	a	0.00227847	b	0.0178246	bc
M91T342	Unknown	REML	1.46383e-12	0.0794049	b	0.000864525	a	0.00221444	a	0.0021852	a
M69T435	Unknown	REML	9.55932e-07	0	b	0.0330327	a	0	b	0.0311657	a
M67T484	Unknown	REML	5.275e-07	0.0125981	b	0.070481	a	0	b	0.0103479	b
M192T776	Unknown	REML	1.03034e-08	0.0710485	c	0	a	0.029129	b	0	a
M108T550	Unknown	REML	1.00717e-11	0.0035852	a	0	a	0.0290363	b	0.00614095	a
M99T436	Unknown	REML	0	0.0624388	c	0	a	0.0205993	b	0	a
M202T663	Unknown	REML	1.31882e-10	0	b	0.00861966	a	0.000131087	b	0.0243332	c
M79T471	Unknown	REML	0.00129151	0.0423209	b	0.00108096	a	0.011885	a	0.0231257	ab
M167T630	Unknown	REML	4.61117e-07	0.00438557	b	0.0524888	a	0	b	0.0080028	b
M59T692	Unknown	REML	1.06926e-05	0.0530054	b	0.00340363	a	0	a	0	a
M56T515	Cyclopropane, 1-heptyl-2-methyl-	REML	6.92438e-07	0.00851619	b	0.0507279	a	0.00165416	b	0.00521259	b
M138T518	Unknown	REML	0.00426034	0.0155581	b	0	a	0.0226215	b	0	a
M133T721	Unknown	REML	9.73026e-05	0	b	0.0495068	a	0	b	0.0211431	b
M69T508	Geranyl acetate	REML	0.000501851	0.0481523	b	0.0006049	a	0.0167629	a	0	a
M163T628	Unknown	REML	0.000468307	0.0361501	c	0	a	0.0209194	bc	0.00868565	ab
M163T602	Unknown	REML	0.00147855	0.0183549	b	0	a	0.0207951	b	0	a
M202T696	Unknown	REML	1.18253e-08	0.00109795	a	0.00198782	a	0.00183285	a	0.0191415	b
M192T780	Unknown	REML	3.16066e-06	0.0430319	b	0	a	0.0138612	a	0	a
M202T816	Unknown	REML	4.30034e-12	0	a	0.00356739	a	0	a	0.0172058	b
M94T671	Unknown	REML	0.000381278	0.0250417	c	0.00617174	a	0.0138873	ab	0.0169914	bc
M108T435	Unknown	REML	1.01907e-05	0.00944736	c	0	a	0.0172197	b	0	a
M59T654	Unknown	REML	1.15497e-08	0	a	0	a	0.0163563	b	0	a
M69T705	Unknown	REML	6.67052e-06	0	c	0.00911042	a	0.0155284	b	0.00891057	a
M179T728	Unknown	REML	2.33177e-08	0.00242981	a	0	a	0.0153786	b	0	a
M195T662	Unknown	REML	0	0	a	0	a	0.0151987	b	0	a
M173T614	Unknown	REML	1.26632e-12	0.0178839	b	0	a	0.0144109	b	0.000303659	a
M107T675	Unknown	REML	0.00417265	0.0241471	b	0	a	0.014078	ab	0.00485455	a
M123T452	Unknown	REML	4.26671e-08	0	b	0.0310064	a	0	b	0	b
M135T504	Unknown	REML	1.26397e-11	0.00733092	c	0	a	0.0137838	b	0	a
M98T422	Unknown	REML	0.0405199	0.00617775	b	0.0228198	a	0.0124133	ab	0.0123107	ab
M162T700	Unknown	REML	0.000404802	0.0100957	b	0.0278804	a	0.00154055	b	0.00572786	b
M69T728	Unknown	REML	0.000908975	0	a	0.00100635	a	0	a	0.0117597	b
M151T642	Unknown	REML	7.59099e-07	0.00245336	b	0.0265132	a	0.000427366	b	0.00752637	b
M67T471	Unknown	REML	0.000338109	0.0260537	b	0	a	0.00795632	a	0	a
M179T724	Unknown	REML	2.62511e-10	0	a	0	a	0.0107497	b	0	a
M135T512	Unknown	REML	6.09891e-07	0.00389733	a	0	a	0.0103241	b	0	a
M218T739	Unknown	REML	0.000368343	0	a	0.00479467	a	0.00352241	a	0.00964971	b
M69T407	Unknown	REML	0.000897214	0	b	0.00787619	a	0	b	0.00949481	a
M83T485	Unknown	REML	2.09824e-10	0	b	0.0210958	a	0	b	0.00694743	c
M138T729	Unknown	REML	0.000890255	0.00972783	b	0.0201263	a	0.0035317	b	0.00742491	b
M192T672	Unknown	REML	0.00144909	0.00226455	c	0.00614267	ab	0.0029312	ac	0.0075994	b
M151T716	Unknown	REML	2.8999e-13	0	a	0	a	0.00796463	b	0	a
M59T371	Unknown	REML	0.00356373	0.0152012	b	0	a	0.00794015	a	0	a
M97T516	Unknown	REML	6.50369e-13	0.0181794	c	0	a	0.00556995	b	0	a
M175T655	Unknown	REML	8.44646e-09	0	a	0.000665167	a	0.000733416	a	0.00754511	b
M120T411	Unknown	REML	0.0345039	0	b	0.00966559	a	0.00496381	ab	0.00746274	ab
M91T510	Unknown	REML	2.15117e-12	0.00100389	b	0.0174015	a	0.000633934	b	0.00516829	c
M81T418	Unknown	REML	1.95167e-10	0.017896	c	0	a	0.00671918	b	0	a
M150T517	Unknown	REML	6.35086e-05	0.00117138	b	0.00767199	a	0.00315823	b	0.00742365	a
M101T433	Unknown	REML	0.000342911	0.0123125	b	0	a	0.00751857	b	0	a
M100T718	Unknown	REML	0.0352058	0.00101076	b	0.0166064	a	0.00172862	ab	0.00159089	ab
M112T831	Unknown	REML	0.00394027	0.00440354	ab	0	a	0.00737242	b	0.00239069	a
M143T804	Unknown	REML	0.000984771	0.00586228	b	0.000855912	a	0.000169257	a	0.00683335	b
M59T544	Unknown	REML	3.27102e-05	0.00379413	b	0	a	0.00684657	b	0	a
M93T477	Unknown	REML	0.022084	0.0145011	b	0	a	0.00645028	ab	0	a
M71T594	Unknown	REML	8.87965e-10	0	c	0.00757091	a	0.00618545	ab	0.00551952	b
M107T520	Unknown	REML	0.00420116	0.00568836	b	0	a	0.00609007	b	0	a
M252T696	Unknown	REML	0.00255555	0.00251466	ab	0	a	0.00572953	b	0	a
M109T391	Unknown	REML	1.52104e-09	0.0113537	c	0	a	0.00568768	b	0	a
M91T790	Unknown	REML	2.39137e-09	0.0122194	b	0	a	0.00259293	a	0	a
M103T394	Unknown	REML	1.12716e-08	0	b	0.0117293	a	0	b	0.00270261	b
M94T506	Unknown	REML	0.000242937	0.00652792	b	0.000385988	a	0.00520742	b	0.000520016	a
M109T475	Unknown	REML	0.00171472	0.00216742	a	0	a	0.00514829	b	0	a
M135T462	Unknown	REML	9.4991e-07	0.00583843	b	0	a	0.00511876	b	0	a
M93T385	Unknown	REML	0	0.0106602	b	0	a	0.000850221	a	0	a
M69T454	Unknown	REML	0.0175787	0.000444302	bc	0.00504084	a	0	b	0.00437262	ac
M165T722	Unknown	REML	1.71224e-06	0	a	0	a	0.00454975	b	0	a
M112T827	Unknown	REML	0.000652902	0.0102405	b	0.000160995	a	0.00407353	a	7.10087e-05	a
M83T516	Unknown	REML	7.00759e-11	0	a	0.000196136	a	0	a	0.00423311	b
M59T572	Unknown	REML	7.93843e-08	0.00974874	b	0.000248937	a	0.00310197	a	3.59038e-05	a
M73T982	Unknown	REML	7.02588e-05	0.0043863	b	0.00934707	a	0.00129198	b	0.00197373	b
M97T607	Unknown	REML	0.0075191	0	b	0.00920682	a	0	b	0.00129414	b
M109T500	Unknown	REML	0.000176871	0.00261516	b	0	a	0.00325382	b	0.000506339	a
M91T374	Unknown	REML	1.35447e-14	0.00737239	b	0	a	0.00103484	a	0	a
M159T612	Unknown	REML	3.30486e-06	9.1047e-05	b	0.00266817	a	0.00299964	a	0.00303208	a
M161T609	Unknown	REML	7.90795e-09	0	a	0	a	0.00310308	b	0.000199115	a
M104T571	Unknown	REML	0.00175903	0.00676494	b	0.000328204	a	0	a	0	a
M98T555	Unknown	REML	3.87511e-05	0.00131822	c	0	a	0.00271093	b	0	a
M93T381	Unknown	REML	2.67788e-07	0.00551974	b	0	a	0.00115899	a	0	a
M149T714	Unknown	REML	0.00731233	0.00183035	b	0.00533983	a	0.000500221	b	0.00141435	b
M91T526	Unknown	REML	0.00256078	0.00517566	b	9.62089e-05	a	0.000534682	a	0.000489481	a
M137T611	Unknown	REML	2.67542e-11	0.000240203	a	0	a	0.00220156	b	0.000118747	a
M58T842	Unknown	REML	1.53493e-09	0.00182826	c	0.0041097	a	0.000103455	b	0.000648595	b
M193T791	Unknown	REML	0.0291141	0	a	0	a	0	a	0.00172066	b
M131T707	Unknown	REML	4.52762e-08	0.000224996	b	0.00396508	a	0	b	0	b
M120T467	Unknown	REML	7.85192e-07	0	b	0.0036465	a	0	b	0.000139173	b
M98T547	Unknown	REML	3.79159e-10	0.000159866	a	0	a	0.0016174	b	0	a
M113T526	Unknown	REML	9.9133e-07	0	b	0.00354624	a	0	b	0	b
M153T571	Unknown	REML	0.0131805	0.00362475	b	0	a	0.000431325	a	0	a
M84T839	Unknown	REML	0.00774164	0.00336931	b	0	a	0.000155017	a	0	a
M161T577	Unknown	REML	0.000106048	0	a	0.000135323	a	0.00111525	b	0	a
M183T673	Unknown	REML	0.00838924	0.00117207	b	0.000461659	a	0.000664366	ab	0.000998124	b
M162T584	Unknown	REML	2.17257e-07	4.05097e-05	a	0	a	0.000973045	b	0.000107505	a
M132T419	Unknown	REML	0.000163653	0.00150891	b	0	a	0.000910438	b	0	a
M123T497	Unknown	REML	2.029e-07	0.000458153	c	0	a	0.000837019	b	0	a
M124T585	Unknown	REML	0.000186707	0	a	0	a	0	a	0.000608917	b
M59T804	Unknown	REML	0.000918577	0.000394463	b	0.00126464	a	0.000171646	b	0.000360937	b
